# Supplementary material for: Precision exercise medicine: predicting unfavourable status and development in the 20-m shuttle run test performance in adolescence with machine learning
Source: HighWire-hosted journal article supplement (doi:10.1136/bmjsem-2021-001053), 2021-05-01

## **Precision exercise medicine: Predicting unfavorable status and development in the 20-m shuttle run test performance in adolescence with machine learning.**

Laura Joensuu<sup>1,2\*</sup>, Ilkka Rautiainen<sup>3\*</sup>, Sami Äyrämö<sup>3</sup>, Heidi J Syväoja<sup>2</sup>, Jukka-Pekka Kauppi<sup>3</sup>, Urho M Kujala<sup>1</sup>, Tuija H Tammelin<sup>2</sup>.

<sup>1</sup>*Faculty of Sport and Health Sciences, University of Jyväskylä, Jyväskylä, Finland*

<sup>2</sup>*LIKES Research Centre for Physical Activity and Health, Jyväskylä, Finland*

<sup>3</sup>*Faculty of Information Technology, University of Jyväskylä, Jyväskylä, Finland*

\* Authors contributed equally

### **Supplementary information.**

#### **Contents**

|                                                                                                              |    |
|--------------------------------------------------------------------------------------------------------------|----|
| Supplementary Document 1. List of all variables.....                                                         | 2  |
| Supplementary Document 2. Code package .....                                                                 | 6  |
| Supplementary Document 3. Further description of predictive modelling.....                                   | 6  |
| Supplementary Document 4. Results of the ROC analysis and random forest predictor importance estimates ..... | 11 |
| Supplementary Document 5. Best predictors for development .....                                              | 20 |

**Supplementary Document 1. List of all variables.**

| Variables                                                                     | Range for continuous variables, and scale for nominal and ordinal variables | Unit                    | Notes                                                                                                                                                                     | Measured |
|-------------------------------------------------------------------------------|-----------------------------------------------------------------------------|-------------------------|---------------------------------------------------------------------------------------------------------------------------------------------------------------------------|----------|
| <b>Background information</b>                                                 |                                                                             |                         |                                                                                                                                                                           |          |
| Age                                                                           | 9.2–15.3                                                                    | years                   | Decimal age (counted from date of birth)                                                                                                                                  | S 2013   |
| Sex                                                                           | 0, 1                                                                        | boy = 0,<br>girl = 1    |                                                                                                                                                                           | S 2013   |
| Studying in a school which is part of the Finnish schools on the Move program | 0, 1                                                                        | no = 0,<br>yes = 1      |                                                                                                                                                                           | S 2013   |
| <b>Data from objective measurements</b>                                       |                                                                             |                         |                                                                                                                                                                           |          |
| Accelerometry-based physical activity                                         |                                                                             |                         |                                                                                                                                                                           |          |
| Sedentary time                                                                | 40–86                                                                       | %                       | Percentage of device wearing time                                                                                                                                         | S 2013   |
| Light physical activity                                                       | 88–378                                                                      | min · day <sup>-1</sup> | Weighted mean value                                                                                                                                                       | S 2013   |
| Moderate-to-vigorous physical activity                                        | 9–163                                                                       | min · day <sup>-1</sup> | Weighted mean value                                                                                                                                                       | S 2013   |
| Continuous sedentary time                                                     | 15–343                                                                      | min · day <sup>-1</sup> | Weighted mean value of continuous sedentary time longer than 10min                                                                                                        | S 2013   |
| Counts                                                                        | 111–1211                                                                    | cpm · day <sup>-1</sup> | Counts per minute per day. Weighted mean value                                                                                                                            | S 2013   |
| Physical fitness                                                              |                                                                             |                         |                                                                                                                                                                           |          |
| Performance in the 20-m shuttle run test at baseline                          | 3–109                                                                       | laps                    | Laps run until voluntary exhaustion. Protocol by Finnish Move! – monitoring system for physical functional capacity (slightly modified version from the EUROFIT protocol) | S 2013   |
| 5-leaps test                                                                  | 4.5–12.2                                                                    | m                       | Distance measured in 0.1 m accuracy                                                                                                                                       | S 2013   |
| Push-ups                                                                      | 0–63                                                                        | repetitions             | Within 1-minute                                                                                                                                                           | S 2013   |
| Curl-up                                                                       | 0–75                                                                        | repetitions             | Maximum of 75 repetitions                                                                                                                                                 | S 2013   |
| Flexibility score                                                             | 0–4                                                                         | sum                     | Sum of four flexibility assessments                                                                                                                                       | S 2013   |
| Throwing-catching combination test                                            | 0–20                                                                        | repetitions             | Maximum of 20 repetitions                                                                                                                                                 | S 2013   |

Precision exercise medicine: Predicting unfavorable status and development in the 20-m shuttle run test performance in adolescence with machine learning.  
 Laura Joensuu, Ilkka Rautiainen, Sami Äyrämö, Heidi J Syväoja, Jukka-Pekka Kauppi, Urho M Kujala, Tuija H Tammelin (2021)

| Antropometrics and body composition      |                                                                               |             |                                                        |                                                                             |        |
|------------------------------------------|-------------------------------------------------------------------------------|-------------|--------------------------------------------------------|-----------------------------------------------------------------------------|--------|
|                                          | Height                                                                        | 131.3–184.9 | m                                                      | Stature measured in 0.1 cm accuracy                                         | S 2013 |
|                                          | Visceral Fat                                                                  | 5.0–223.7   | cm <sup>2</sup>                                        | Estimation by bioelectric impedance                                         | S 2013 |
|                                          | Weight                                                                        | 24.3–102.8  | kg                                                     | Measured in 0.1 kg accuracy                                                 | S 2013 |
|                                          | Skeletal muscle mass                                                          | 10.6–39.5   | kg                                                     | Estimation by bioelectric impedance                                         | S 2013 |
|                                          | Body fat percentage                                                           | 3.0–47.9    | %                                                      | Estimation by bioelectric impedance                                         | S 2013 |
|                                          | BMI                                                                           | 12.8–36.3   | kg·m <sup>-2</sup>                                     |                                                                             | S 2013 |
|                                          | Waist circumference                                                           | 45.0–118.2  | cm                                                     |                                                                             | S 2013 |
|                                          | BMI classification                                                            | 1–3         | Normal weight = 1,<br>overweight = 2,<br>or obese = 3. | Classification by Cole scale                                                | S 2013 |
| Data from self-assessment questionnaires |                                                                               |             |                                                        |                                                                             |        |
|                                          | Pubertal status                                                               | 0–5         | pre-pubertal = 0,<br>fully matured = 5.                | Classification by Tanner scale. From pre-pubertal to fully matured.         | S 2013 |
|                                          | Perceived health                                                              | 1–4         | very good = 1,<br>poor = 4                             | From very good to poor. ICC: 0.575                                          | S 2013 |
|                                          | Perceived fitness                                                             | 1–4         | very good = 1,<br>poor = 4                             | From very good to poor. ICC: 0.678                                          | S 2013 |
|                                          | Days with physical activity for at least 60min/day during the previous 7 days | 0–8         | 1 = 0 days,<br>8 = 7 days                              | From 0–7 days. ICC: 0.590                                                   | S 2013 |
|                                          | Amount of moderate-to-vigorous physical activity during leisure-time          | 0–6         | 1 = not at all,<br>6 = 7 hours or more                 | From 0 to ≥7 h/week. ICC: 0.752                                             | S 2013 |
|                                          | Participation to physical activity clubs in schools                           | 1–3         | not at all = 1,<br>regularly = 3                       | From not at all to regularly. ICC:0.704                                     | S 2013 |
|                                          | Participation to sport club practices                                         | 1–4         | not at all = 1,<br>regularly = 3                       | From not at all to regularly. ICC: 0.876                                    | S 2013 |
|                                          | Participation to sport competitions or matches                                | 1–5         | not at all = 1,<br>regularly = 3                       | From not at all to regularly. ICC: 0.865                                    | S 2013 |
|                                          | Bedtime on schooldays                                                         | 1–7         | From 21:00 = 1,<br>to 24:00 or later = 7               | From 21:00 to 24:00 or later. Assessed with half hour intervals. ICC: 0.876 | S 2013 |

Precision exercise medicine: Predicting unfavorable status and development in the 20-m shuttle run test performance in adolescence with machine learning.  
Laura Joensuu, Ilkka Rautiainen, Sami Äyrämö, Heidi J Syväoja, Jukka-Pekka Kauppi, Urho M Kujala, Tuija H Tammelin (2021)

|  |                                         |      |                                             |                                                                                                                                                                                                    |        |
|--|-----------------------------------------|------|---------------------------------------------|----------------------------------------------------------------------------------------------------------------------------------------------------------------------------------------------------|--------|
|  | Tiredness on school mornings            | 1–4  | never = 1,<br>4 times/week on more = 4      | From never to 4 times/week on more. ICC: 0.679                                                                                                                                                     | S 2013 |
|  | Eating breakfast during school week     | 1–4  | every day = 1,<br>rarely = 4                | From every day to rarely. ICC: 0.621                                                                                                                                                               | S 2013 |
|  | Smoking habits                          | 1–5  | not at all = 1,<br>once a day or more = 5   | From not at all to once a day or more.                                                                                                                                                             | F 2013 |
|  | Alcohol consumption                     | 1–9  | not at all = 1,<br>every day = 5            | From not at all to every day.                                                                                                                                                                      | F 2013 |
|  | Unhealthy diet index                    | 1–7  | not at all = 1,<br>more than once a day = 7 | An index score for eating unhealthy foods from not at all to more than once a day (an average score of eating sweets or chocolate, sugary soft drinks, hamburgers or hot dogs, crisps, and pizza). | F 2013 |
|  | Healthy diet index                      | 1–7  | not at all = 1,<br>more than once a day = 7 | An index score for eating healthy foods from not at all to more than once a day (an average of eating fruits and vegetables).                                                                      | F 2013 |
|  | School enjoyment                        | 1–4  | a lot = 1,<br>not at all = 4                | From a lot to not at all. ICC: 0.752                                                                                                                                                               | S 2013 |
|  | School strain                           | 1–4  | not at all = 1,<br>a lot = 4                | From not at all to a lot. ICC: 0.608                                                                                                                                                               | S 2013 |
|  | Being bullied at school                 | 1–5  | not at all = 1,<br>several times a week = 5 | Being bullied within a last couple of months from not at all, to several times a week. ICC: 0.428                                                                                                  | S 2013 |
|  | Perceived social status in school       | 1–10 | 10 = 1,<br>1 = 10                           | A ladder scale: on the high end students who are appreciated most (10, coded as 1). At low end students who nobody appreciates (1, coded as 10). ICC: 0.779                                        | S 2013 |
|  | Perceived societal status of the family | 1–10 | 10 = 1,<br>1 = 10                           | A ladder scale: on the high end people who most people appreciate (10, coded as 1). At low end people who most of the people don't appreciate (1, coded as 10). ICC: 0.700                         | S 2013 |
|  | Life enjoyment                          | 1–7  | 4 = 1,<br>10 = 7                            | Overall enjoyment of current life (in school grade points 4-10). ICC: 0.722                                                                                                                        | S 2013 |

Precision exercise medicine: Predicting unfavorable status and development in the 20-m shuttle run test performance in adolescence with machine learning.  
 Laura Joensuu, Ilkka Rautiainen, Sami Äyrämö, Heidi J Syväoja, Jukka-Pekka Kauppi, Urho M Kujala, Tuija H Tammelin (2021)

|                            |                                                                |         |                                         |                                                                                                                                                                                                                                                  |        |
|----------------------------|----------------------------------------------------------------|---------|-----------------------------------------|--------------------------------------------------------------------------------------------------------------------------------------------------------------------------------------------------------------------------------------------------|--------|
|                            | Parents willing to help if problems at school                  | 1–5     | totally agree = 1, totally disagree = 5 | From I totally agree to I totally disagree. ICC: 0.661                                                                                                                                                                                           | S 2013 |
|                            | Parents are willing to discuss with teachers                   | 1–5     | totally agree = 1, totally disagree = 5 | From I totally agree to I totally disagree. ICC: 0.709                                                                                                                                                                                           | S 2013 |
|                            | Parents encourage to success in school                         | 1–5     | totally agree = 1, totally disagree = 5 | From I totally agree to I totally disagree. ICC: 0.527                                                                                                                                                                                           | S 2013 |
|                            | Parents interested what happens in school                      | 1–5     | totally agree = 1, totally disagree = 5 | From I totally agree to I totally disagree. ICC: 0.675                                                                                                                                                                                           | S 2013 |
|                            | Parents willing to help with schoolwork                        | 1–5     | totally agree = 1, totally disagree = 5 | From I totally agree to I totally disagree. ICC: 0.624                                                                                                                                                                                           | S 2013 |
| <b>Data from registers</b> |                                                                |         |                                         |                                                                                                                                                                                                                                                  |        |
|                            | Grade point average                                            | 5.5–9.9 | 4.0–10.0                                | The average of teacher's rated academic scores including native language, foreign language, physics, chemistry, mathematics, biology, geography, religion, philosophy, history, music, art, technical or textile skills, and physical education. | S 2013 |
|                            | Grade point in Physical Education                              | 6–10    | 4.0–10.0                                | Grade point in PE. Teacher's evaluation.                                                                                                                                                                                                         | S 2013 |
| <b>Outcome variables</b>   |                                                                |         |                                         |                                                                                                                                                                                                                                                  |        |
|                            | Performance in the 20-m shuttle run test at follow-up (task 1) |         | laps                                    | Performance in the 20-m shuttle run test in follow-up measurements                                                                                                                                                                               | S 2015 |
|                            | Change in 20-m shuttle run result (task 2)                     |         | laps                                    | Absolute difference between baseline (S 2013) and follow-up measurements (S 2015)                                                                                                                                                                |        |

cpm, counts per minute; S 2013, spring semester 2015; F 2013, fall semester 2013; S 2015, spring semester 2015, ICC: Intraclass correlation coefficient of the variable in a test-retest analysis. (n=181)

### **Supplementary Document 2. Code package**

The MATLAB script and functions employing the RF classifier can be downloaded from the following address as a compressed zip file:

[http://users.jyu.fi/~iltaraut/Supplement\\_2.zip](http://users.jyu.fi/~iltaraut/Supplement_2.zip)

The password for the zip file is "BJSMSupplement2" without quotes. For Windows, a separate file archiver, such as 7-Zip, WinRAR or WinZip, might be needed to open the encrypted archive.

### **Supplementary Document 3. Further description of predictive modelling**

#### **Training and prediction**

In random forest (RF) it is important that the individual trees are uncorrelated because low correlation helps to protect the forest from misclassifications. This goal is achieved in RF by two techniques: bootstrap aggregation (aka bagging) and random feature selection. Firstly, bagging refers to taking a bootstrap sample with replacement from the training data when forming a new tree, the result being a forest where each tree is formed using a different data sample. A new data sample to be predicted is then shown to the forest, the final prediction being the average prediction of individual prediction or, in the case of classification, the most popular prediction among the trees. Secondly, random feature selection is a technique where, instead of all the features, only a limited random set of features is available for each tree. This feature set is picked up randomly each time a new tree is grown (1,2).

Precision exercise medicine: Predicting unfavorable status and development in the 20-m shuttle run test performance in adolescence with machine learning.  
Laura Joensuu, Ilkka Rautiainen, Sami Äyrämö, Heidi J Syväoja, Jukka-Pekka Kauppi, Urho M Kujala, Tuija H Tammelin (2021)

As an additional note regarding the feature importance estimation in RF, it can be said that if the feature contains important information for classification, randomly permuting the feature values will increase the classification error. Moreover, if the feature does not contain information for classification, randomly permuting the values will not influence the classification error (1).

The training phase included procedures to optimize 20MSRT prediction with RF and the training data. Bayesian optimization (3) was employed to estimate the optimal hyperparameters (e.g. the method parameters that must be defined beforehand) for RF. The F1-score measure, which balances the precision and sensitivity of the classifier by computing their harmonic mean, was used as the optimization target for the RF out-of-bag samples. It is defined as

$$F1 = 2 \times \frac{\textit{precision} \times \textit{sensitivity}}{\textit{precision} + \textit{sensitivity}}$$

where

$$\textit{precision} = \frac{TP}{TP + FP}$$

and

$$\textit{sensitivity} = \frac{TP}{TP + FN}$$

In the above equations, TP (true positives) refers to the number of correctly detected lowest tertile cases. FP (false positives) is the number of cases incorrectly identified as belonging to the lowest tertile and FN (false negatives) is the number of cases incorrectly identified as belonging to the second

or third tertile. Since the Bayesian optimization aims to minimize the given objective, the final target for optimization was  $1 - F1$ . In addition to abovementioned equations, specificity, defined as

$$specificity = \frac{TN}{TN + FP},$$

was employed as a performance metric.

In order to make the standard binary classification measures usable for a three class classification problem, the optimization was employed specifically for the lowest tertile group, i.e. the F1-score to be optimized was calculated by comparing the lowest tertile group to the two other groups. After training, a testing phase was implemented where the validity of the findings was tested against the left-out fold in 10-fold CV. During this phase, the measures used to estimate the prediction performance were AUC, sensitivity and specificity. Similarly to the F1-score employment before, these measures were calculated using the lowest tertile vs. other tertiles approach.

For handling the missing values in data, the original random forest method suggested two ways of imputing the missing values (1). The TreeBagger implementation in MATLAB employs a surrogate decision split especially for handling the missing values in data. When the surrogate decision splits flag is set to “on”, a similar or correlated predictor value is used instead of the missing value.

Four RF hyperparameters in MATLAB’s TreeBagger function were optimized:

1. *NumPredictorsToSample*: The number of variables to select at random for each decision split (range to search was from 1 to 47, which was the total number of usable variables)
2. *MinLeafSize*: The minimum number of observations per tree leaf (range from 1 to 20).
3. *MaxNumSplits*: The maximal number of decision splits (range from 1 to 20).

Precision exercise medicine: Predicting unfavorable status and development in the 20-m shuttle run test performance in adolescence with machine learning.  
Laura Joensuu, Ilkka Rautiainen, Sami Äyrämö, Heidi J Syväoja, Jukka-Pekka Kauppi, Urho M Kujala, Tuija H Tammelin (2021)



4. *Surrogate*: Surrogate decision splits flag (options included on, off and all).

Static modified RF parameters included:

1. The number of trees in the forest was set to 500.
2. *Studying in a school which is part of the Finnish schools on the Move program* was set as a categorical variable (option *CategoricalPredictors*).
3. Algorithm used to select the best split predictor (option *PredictorSelection*) was set to *interaction-curvature*.

In addition, two static parameters were modified in MATLAB's Bayesian optimization (bayesopt) function:

1. *MaxObjectiveEvaluations* was set to 100, meaning that there are one hundred iterations to search for optimal hyperparameters, after which the optimization is terminated.
2. *AcquisitionFunctionName* was set to *expected-improvement-plus*.

**Supplementary Table 1. List of variables that were age-adjusted using linear regression**

|                                        |
|----------------------------------------|
| 5-leaps test                           |
| Alcohol consumption                    |
| BMI                                    |
| Body fat percentage                    |
| Continuous sedentary time              |
| Counts                                 |
| Curl-up                                |
| Flexibility score                      |
| Healthy diet index                     |
| Height                                 |
| Light physical activity                |
| Moderate-to-vigorous physical activity |
| Parents encourage to success in school |

Precision exercise medicine: Predicting unfavorable status and development in the 20-m shuttle run test performance in adolescence with machine learning.  
 Laura Joensuu, Ilkka Rautiainen, Sami Äyrämö, Heidi J Syväoja, Jukka-Pekka Kauppi, Urho M Kujala, Tuija H Tammelin (2021)

|                                                      |
|------------------------------------------------------|
| Parents interested what happens in school            |
| Parents willing to discuss with teachers             |
| Parents willing to help if problems at school        |
| Parents willing to help with schoolwork              |
| Performance in the 20-m shuttle run test at baseline |
| Pubertal status classification                       |
| Push-ups                                             |
| Sedentary time                                       |
| Skeletal muscle mass                                 |
| Smoking habits                                       |
| Throwing-catching combination test                   |
| Unhealthy diet index                                 |
| Visceral fat                                         |
| Waist circumference                                  |
| Weight                                               |

## References

1. Breiman L. Random forests. *Mach Learn*. 2001;45(1):5–32.
2. Hastie T, Tibshirani R, Friedman J. *The elements of statistical learning: data mining, inference, and prediction*. Springer Science & Business Media; 2009.
3. Bull AD. Convergence Rates of Efficient Global Optimization Algorithms. *J Mach Learn Res [Internet]*. 2011;12(88):2879–904. Available from: <http://jmlr.org/papers/v12/bull11a.html>

Precision exercise medicine: Predicting unfavorable status and development in the 20-m shuttle run test performance in adolescence with machine learning.  
Laura Joensuu, Ilkka Rautiainen, Sami Äyrämö, Heidi J Syväoja, Jukka-Pekka Kauppi, Urho M Kujala, Tuija H Tammelin (2021)

#### Supplementary Document 4. Results of the ROC analysis and random forest predictor importance estimates

The following four tables include the results for two separate analyses. The first one is the ROC analysis. For each variable, an Area Under Curve (AUC) value and the associated direction is reported. In the ROC analysis phase, the AUC value is estimated for each of the variables separately, by using one variable at a time as the independent variable and performance in the **20-m shuttle run test at follow-up** as the dependent variable. There are two types of arrows in the tables. They should be interpreted in the following manner:

- ↘: The *lower* the variable value, the higher is the probability of the student belonging to the lowest tertile.
- ↗: The *higher* the variable value, the higher is the probability of the student belonging to the lowest tertile.

The second analysis, performed completely separately from the ROC analysis described above, is the delta error mean value and its p value for each variable. These results originate from the random forest's feature importance estimate analysis.

#### Girls: Prediction of 20MSRT performance at follow-up

| Variable                                             | ROC analysis |                      | Random forest feature importance |          |
|------------------------------------------------------|--------------|----------------------|----------------------------------|----------|
|                                                      | AUC          | Associated direction | Delta error mean                 | P        |
| Performance in the 20-m shuttle run test at baseline | 0.822        | ↘                    | 1.778                            | 0.00013  |
| Body fat percentage                                  | 0.736        | ↗                    | 0.295                            | 4.98E-09 |
| 5-leaps test                                         | 0.714        | ↘                    | 0.312                            | 4.00E-08 |
| Grade point in Physical Education                    | 0.713        | ↘                    | 0.166                            | 0.00012  |
| Grade point average                                  | 0.708        | ↘                    | 0.199                            | 1.86E-05 |
| Push-ups                                             | 0.702        | ↘                    | 0.131                            | 0.00027  |
| Visceral fat                                         | 0.690        | ↗                    | 0.135                            | 1.09E-05 |
| Moderate-to-vigorous physical activity               | 0.652        | ↘                    | 0.125                            | 0.00344  |
| BMI                                                  | 0.645        | ↗                    | 0.030                            | 0.06571  |
| Counts                                               | 0.643        | ↘                    | 0.274                            | 2.72E-05 |
| Curl-up                                              | 0.622        | ↘                    | 0.009                            | 0.62857  |
| Flexibility score                                    | 0.614        | ↘                    | 0.041                            | 0.04908  |

Precision exercise medicine: Predicting unfavorable status and development in the 20-m shuttle run test performance in adolescence with machine learning.  
 Laura Joensuu, Ilkka Rautiainen, Sami Äyrämö, Heidi J Syväoja, Jukka-Pekka Kauppi, Urho M Kujala, Tuija H Tammelin (2021)

|                                                                                      |       |   |        |          |
|--------------------------------------------------------------------------------------|-------|---|--------|----------|
| <b>Waist circumference</b>                                                           | 0.614 | ↗ | -0.020 | 0.08999  |
| <b>Parents willing to help with schoolwork</b>                                       | 0.597 | ↗ | -0.012 | 0.40727  |
| <b>BMI classification</b>                                                            | 0.596 | ↗ | -0.018 | 0.03220  |
| <b>Weight</b>                                                                        | 0.586 | ↗ | 0.011  | 0.25740  |
| <b>Life enjoyment</b>                                                                | 0.584 | ↘ | -0.007 | 0.46964  |
| <b>Eating breakfast during schoolweek</b>                                            | 0.582 | ↗ | -0.008 | 0.24529  |
| <b>Unhealthy diet index</b>                                                          | 0.580 | ↗ | 0.016  | 0.34412  |
| <b>Days with PA for at least 60min/day during the previous 7 days</b>                | 0.578 | ↘ | 0.020  | 0.23977  |
| <b>Participation to sport competitions or matches</b>                                | 0.578 | ↘ | 0.143  | 3.91E-05 |
| <b>Being bullied at school</b>                                                       | 0.576 | ↗ | 0.004  | 0.74703  |
| <b>Parents interested what happens in school</b>                                     | 0.570 | ↗ | 0.026  | 0.07335  |
| <b>Amount of moderate-to-vigorous physical activity during leisure-time</b>          | 0.570 | ↘ | 0.006  | 0.55980  |
| <b>Throwing-catching combination test</b>                                            | 0.565 | ↘ | 0.050  | 0.05235  |
| <b>Perceived social status at school</b>                                             | 0.564 | ↗ | 0.025  | 0.01456  |
| <b>Sedentary time</b>                                                                | 0.564 | ↗ | 0.073  | 0.00948  |
| <b>Parents encourage to success in school</b>                                        | 0.563 | ↗ | -0.021 | 0.25787  |
| <b>Parents willing to discuss with teachers</b>                                      | 0.563 | ↗ | -0.009 | 0.68365  |
| <b>Healthy diet index</b>                                                            | 0.560 | ↘ | -0.017 | 0.21666  |
| <b>Participation to sport club practices</b>                                         | 0.551 | ↘ | 0.033  | 0.02458  |
| <b>Studying in a school which is part of the Finnish schools on the Move program</b> | 0.547 | ↗ | -0.015 | 0.13847  |
| <b>Light physical activity</b>                                                       | 0.544 | ↘ | 0.017  | 0.27079  |
| <b>Parents willing to help if problems at school</b>                                 | 0.543 | ↗ | -0.018 | 0.20185  |
| <b>Alcohol consumption</b>                                                           | 0.537 | ↗ | 0.023  | 0.10378  |
| <b>Height</b>                                                                        | 0.536 | ↘ | 0.007  | 0.60257  |
| <b>Smoking habits</b>                                                                | 0.531 | ↗ | -0.002 | 0.81458  |
| <b>Continuous sedentary time</b>                                                     | 0.531 | ↗ | 0.006  | 0.65614  |
| <b>School strain</b>                                                                 | 0.529 | ↗ | -0.003 | 0.73604  |
| <b>Perceived fitness</b>                                                             | 0.529 | ↗ | 0.008  | 0.42683  |

Precision exercise medicine: Predicting unfavorable status and development in the 20-m shuttle run test performance in adolescence with machine learning.  
 Laura Joensuu, Ilkka Rautiainen, Sami Äyrämö, Heidi J Syväoja, Jukka-Pekka Kauppi, Urho M Kujala, Tuija H Tammelin (2021)

|                                                           |       |   |        |         |
|-----------------------------------------------------------|-------|---|--------|---------|
| <b>Perceived health</b>                                   | 0.529 | ↗ | 0.000  | 1       |
| <b>Tiredness on school mornings</b>                       | 0.521 | ↗ | -0.006 | 0.35962 |
| <b>Age</b>                                                | 0.518 | ↗ | n/a    | n/a     |
| <b>Skeletal muscle mass</b>                               | 0.516 | ↘ | 0.029  | 0.19240 |
| <b>Bedtime on schooldays</b>                              | 0.516 | ↗ | -0.015 | 0.09695 |
| <b>Perceived social status of the family</b>              | 0.513 | ↗ | -0.013 | 0.15855 |
| <b>School enjoyment</b>                                   | 0.513 | ↗ | 0.006  | 0.62529 |
| <b>Pubertal status</b>                                    | 0.512 | ↘ | 0.009  | 0.39893 |
| <b>Participation to physical activity clubs in school</b> | 0.503 | ↘ | -0.004 | 0.34344 |

#### Girls: Prediction of development in the 20MSRT within a subgroup

| Variable                                                                             | ROC analysis |                      | Random forest feature importance |          |
|--------------------------------------------------------------------------------------|--------------|----------------------|----------------------------------|----------|
|                                                                                      | AUC          | Associated direction | Delta error mean                 | P        |
| <b>Grade point average</b>                                                           | 0.675        | ↘                    | 0.211                            | 5.29E-07 |
| <b>Body fat percentage</b>                                                           | 0.632        | ↗                    | 0.076                            | 0.00885  |
| <b>Unhealthy diet index</b>                                                          | 0.628        | ↗                    | 0.146                            | 0.00014  |
| <b>Grade point in Physical Education</b>                                             | 0.627        | ↘                    | 0.034                            | 0.04429  |
| <b>Counts</b>                                                                        | 0.626        | ↘                    | 0.073                            | 0.00514  |
| <b>Life enjoyment</b>                                                                | 0.615        | ↘                    | 0.054                            | 0.00174  |
| <b>Sedentary time</b>                                                                | 0.603        | ↗                    | -0.017                           | 0.45995  |
| <b>Visceral fat</b>                                                                  | 0.596        | ↗                    | 0.118                            | 0.00135  |
| <b>Studying in a school which is part of the Finnish schools on the Move program</b> | 0.594        | ↗                    | -0.015                           | 0.29645  |
| <b>Perceived social status at school</b>                                             | 0.589        | ↗                    | 0.036                            | 0.01460  |
| <b>Moderate-to-vigorous physical activity</b>                                        | 0.587        | ↘                    | 0.028                            | 0.24065  |

Precision exercise medicine: Predicting unfavorable status and development in the 20-m shuttle run test performance in adolescence with machine learning.  
 Laura Joensuu, Ilkka Rautiainen, Sami Äyrämö, Heidi J Syväoja, Jukka-Pekka Kauppi, Urho M Kujala, Tuija H Tammelin (2021)

|                                                                       |       |   |        |          |
|-----------------------------------------------------------------------|-------|---|--------|----------|
| <b>Being bullied at school</b>                                        | 0.584 | ↗ | 0.015  | 0.53917  |
| <b>Light physical activity</b>                                        | 0.583 | ↘ | -0.031 | 0.07665  |
| <b>5-leaps test</b>                                                   | 0.582 | ↘ | 0.088  | 0.00094  |
| <b>Participation to sport club practices</b>                          | 0.567 | ↘ | -0.014 | 0.38971  |
| <b>BMI</b>                                                            | 0.567 | ↗ | -0.005 | 0.83415  |
| <b>BMI classification</b>                                             | 0.561 | ↗ | -0.007 | 0.56828  |
| <b>Days with PA for at least 60min/day during the previous 7 days</b> | 0.560 | ↗ | -0.033 | 0.03430  |
| <b>Bedtime on schooldays</b>                                          | 0.560 | ↗ | 0.064  | 0.03029  |
| <b>Flexibility score</b>                                              | 0.560 | ↘ | 0.033  | 0.14350  |
| <b>Parents encourage to success in school</b>                         | 0.560 | ↗ | -0.051 | 0.00169  |
| <b>School strain</b>                                                  | 0.558 | ↗ | -0.004 | 0.75310  |
| <b>Eating breakfast during schoolweek</b>                             | 0.555 | ↗ | -0.006 | 0.72089  |
| <b>Continuous sedentary time</b>                                      | 0.552 | ↗ | -0.015 | 0.22174  |
| <b>Push-ups</b>                                                       | 0.551 | ↘ | -0.021 | 0.22555  |
| <b>Parents interested what happens in school</b>                      | 0.550 | ↗ | 0.012  | 0.35171  |
| <b>Tiredness on school mornings</b>                                   | 0.548 | ↘ | 0.012  | 0.42458  |
| <b>Healthy diet index</b>                                             | 0.546 | ↘ | -0.044 | 0.03057  |
| <b>Participation to physical activity clubs in school</b>             | 0.544 | ↗ | 0.000  | 0.97885  |
| <b>Pubertal status</b>                                                | 0.537 | ↗ | -0.018 | 0.19099  |
| <b>Weight</b>                                                         | 0.536 | ↗ | -0.015 | 0.40546  |
| <b>School enjoyment</b>                                               | 0.532 | ↘ | 0.002  | 0.86673  |
| <b>Parents willing to help with schoolwork</b>                        | 0.532 | ↗ | -0.060 | 0.00028  |
| <b>Perceived social status of the family</b>                          | 0.532 | ↗ | -0.018 | 0.32814  |
| <b>Age</b>                                                            | 0.528 | ↗ | n/a    | n/a      |
| <b>Curl-up</b>                                                        | 0.523 | ↘ | 0.017  | 0.32803  |
| <b>Throwing-catching combination test</b>                             | 0.520 | ↘ | -0.060 | 9.54E-05 |
| <b>Skeletal muscle mass</b>                                           | 0.518 | ↘ | -0.007 | 0.78502  |

Precision exercise medicine: Predicting unfavorable status and development in the 20-m shuttle run test performance in adolescence with machine learning.  
 Laura Joensuu, Ilkka Rautiainen, Sami Äyrämö, Heidi J Syväoja, Jukka-Pekka Kauppi, Urho M Kujala, Tuija H Tammelin (2021)

|                                                                             |       |   |        |         |
|-----------------------------------------------------------------------------|-------|---|--------|---------|
| <b>Perceived fitness</b>                                                    | 0.518 | ↗ | -0.014 | 0.38310 |
| <b>Height</b>                                                               | 0.517 | ↘ | -0.015 | 0.38247 |
| <b>Alcohol consumption</b>                                                  | 0.516 | ↗ | 0.018  | 0.39879 |
| <b>Waist circumference</b>                                                  | 0.516 | ↗ | -0.047 | 0.01471 |
| <b>Participation to sport competitions or matches</b>                       | 0.511 | ↗ | 0.021  | 0.24405 |
| <b>Parents willing to discuss with teachers</b>                             | 0.510 | ↗ | -0.022 | 0.03401 |
| <b>Smoking habits</b>                                                       | 0.506 | ↗ | -0.031 | 0.16880 |
| <b>Perceived health</b>                                                     | 0.505 | ↗ | -0.012 | 0.49579 |
| <b>Parents willing to help if problems at school</b>                        | 0.503 | ↗ | 0.002  | 0.94303 |
| <b>Performance in the 20-m shuttle run test at baseline</b>                 | 0.503 | ↘ | -0.008 | 0.63170 |
| <b>Amount of moderate-to-vigorous physical activity during leisure-time</b> | 0.502 | ↗ | -0.001 | 0.94632 |

#### Boys: Prediction of 20MSRT performance at follow-up

| Variable                                                    | ROC analysis |                      | Random forest feature importance |          |
|-------------------------------------------------------------|--------------|----------------------|----------------------------------|----------|
|                                                             | AUC          | Associated direction | Delta error mean                 | P        |
| <b>Performance in the 20-m shuttle run test at baseline</b> | 0.770        | ↘                    | 1.707                            | 3.41E-07 |
| <b>Body fat percentage</b>                                  | 0.740        | ↗                    | 0.230                            | 4.26E-07 |
| <b>Grade point in Physical Education</b>                    | 0.734        | ↘                    | 0.163                            | 3.20E-05 |
| <b>Push-ups</b>                                             | 0.717        | ↘                    | 0.316                            | 4.06E-08 |
| <b>Visceral fat</b>                                         | 0.715        | ↗                    | 0.213                            | 7.89E-06 |
| <b>5-leaps test</b>                                         | 0.667        | ↘                    | 0.194                            | 3.61E-05 |

Precision exercise medicine: Predicting unfavorable status and development in the 20-m shuttle run test performance in adolescence with machine learning.  
 Laura Joensuu, Ilkka Rautiainen, Sami Äyrämö, Heidi J Syväoja, Jukka-Pekka Kauppi, Urho M Kujala, Tuija H Tammelin (2021)

|                                                                                      |       |   |        |          |
|--------------------------------------------------------------------------------------|-------|---|--------|----------|
| <b>Amount of moderate-to-vigorous physical activity during leisure-time</b>          | 0.648 | ↘ | 0.103  | 1.73E-05 |
| <b>Curl-up</b>                                                                       | 0.647 | ↘ | 0.090  | 0.00144  |
| <b>Counts</b>                                                                        | 0.647 | ↘ | 0.020  | 0.23825  |
| <b>Moderate-to-vigorous physical activity</b>                                        | 0.645 | ↘ | 0.042  | 0.01995  |
| <b>Participation to sport competitions or matches</b>                                | 0.641 | ↘ | 0.059  | 0.00140  |
| <b>BMI</b>                                                                           | 0.635 | ↗ | 0.061  | 0.00502  |
| <b>Waist circumference</b>                                                           | 0.635 | ↗ | 0.079  | 0.00025  |
| <b>Grade point average</b>                                                           | 0.632 | ↘ | 0.069  | 0.01477  |
| <b>Throwing-catching combination test</b>                                            | 0.631 | ↘ | 0.113  | 0.00031  |
| <b>Participation to sport club practices</b>                                         | 0.630 | ↘ | 0.261  | 6.02E-07 |
| <b>Sedentary time</b>                                                                | 0.610 | ↗ | 0.013  | 0.19573  |
| <b>Perceived fitness</b>                                                             | 0.610 | ↗ | 0.036  | 0.00699  |
| <b>Light physical activity</b>                                                       | 0.598 | ↘ | -0.020 | 0.03750  |
| <b>Days with PA for at least 60min/day during the previous 7 days</b>                | 0.594 | ↘ | 0.040  | 0.00559  |
| <b>BMI classification</b>                                                            | 0.593 | ↗ | 0.027  | 0.17184  |
| <b>Weight</b>                                                                        | 0.587 | ↗ | 0.063  | 0.00074  |
| <b>Life enjoyment</b>                                                                | 0.587 | ↘ | 0.026  | 0.04242  |
| <b>Perceived health</b>                                                              | 0.584 | ↗ | 0.009  | 0.15261  |
| <b>Flexibility score</b>                                                             | 0.581 | ↘ | 0.016  | 0.32376  |
| <b>Studying in a school which is part of the Finnish schools on the Move program</b> | 0.560 | ↗ | 0.027  | 0.28360  |
| <b>Perceived social status at school</b>                                             | 0.550 | ↗ | -0.001 | 0.87506  |
| <b>Continuous sedentary time</b>                                                     | 0.547 | ↗ | 0.001  | 0.89948  |
| <b>Parents interested what happens in school</b>                                     | 0.543 | ↘ | -0.006 | 0.49984  |
| <b>Unhealthy diet index</b>                                                          | 0.537 | ↘ | 0.006  | 0.38546  |
| <b>Participation to physical activity clubs in school</b>                            | 0.536 | ↘ | 0.009  | 0.17264  |

Precision exercise medicine: Predicting unfavorable status and development in the 20-m shuttle run test performance in adolescence with machine learning.  
 Laura Joensuu, Ilkka Rautiainen, Sami Äyrämö, Heidi J Syväoja, Jukka-Pekka Kauppi, Urho M Kujala, Tuija H Tammelin (2021)



|                                               |       |   |        |         |
|-----------------------------------------------|-------|---|--------|---------|
| School strain                                 | 0.531 | ↘ | 0.003  | 0.56020 |
| Being bullied at school                       | 0.530 | ↗ | 0.004  | 0.75491 |
| Alcohol consumption                           | 0.524 | ↗ | -0.003 | 0.81026 |
| Bedtime on schooldays                         | 0.524 | ↗ | 0.047  | 0.05392 |
| Eating breakfast during schoolweek            | 0.517 | ↗ | 0.004  | 0.68718 |
| Parents willing to discuss with teachers      | 0.515 | ↘ | -0.039 | 0.00899 |
| School enjoyment                              | 0.515 | ↗ | -0.006 | 0.47068 |
| Smoking habits                                | 0.514 | ↘ | -0.015 | 0.23412 |
| Skeletal muscle mass                          | 0.512 | ↘ | -0.003 | 0.83889 |
| Parents encourage to success in school        | 0.511 | ↗ | 0.000  | 0.96685 |
| Parents willing to help with schoolwork       | 0.510 | ↗ | 0.058  | 0.04542 |
| Perceived social status of the family         | 0.510 | ↗ | 0.000  | 0.96422 |
| Healthy diet index                            | 0.506 | ↘ | -0.025 | 0.05273 |
| Tiredness on school mornings                  | 0.504 | ↘ | 0.000  | 0.96828 |
| Height                                        | 0.503 | ↗ | -0.009 | 0.63760 |
| Parents willing to help if problems at school | 0.501 | ↘ | 0.012  | 0.34387 |
| Age                                           | 0.501 | ↘ | n/a    | n/a     |
| Pubertal status                               | 0.500 | ↗ | 0.026  | 0.21019 |

#### Boys: Prediction of development in the 20MSRT within a subgroup

| Variable                                                                      | ROC analysis |                      | Random forest feature importance |         |
|-------------------------------------------------------------------------------|--------------|----------------------|----------------------------------|---------|
|                                                                               | AUC          | Associated direction | Delta error mean                 | P       |
| Performance in the 20-m shuttle run test at baseline                          | 0.587        | ↗                    | -0.008                           | 0.67323 |
| Studying in a school which is part of the Finnish schools on the Move program | 0.586        | ↗                    | -0.008                           | 0.52483 |

Precision exercise medicine: Predicting unfavorable status and development in the 20-m shuttle run test performance in adolescence with machine learning.  
 Laura Joensuu, Ilkka Rautiainen, Sami Äyrämö, Heidi J Syväoja, Jukka-Pekka Kauppi, Urho M Kujala, Tuija H Tammelin (2021)

|                                                                             |       |   |        |          |
|-----------------------------------------------------------------------------|-------|---|--------|----------|
| <b>Days with PA for at least 60min/day during the previous 7 days</b>       | 0.585 | ↘ | -0.013 | 0.45165  |
| <b>Waist circumference</b>                                                  | 0.580 | ↘ | -0.048 | 0.00181  |
| <b>Unhealthy diet index</b>                                                 | 0.568 | ↗ | -0.062 | 0.00028  |
| <b>Skeletal muscle mass</b>                                                 | 0.567 | ↘ | -0.022 | 0.20299  |
| <b>Amount of moderate-to-vigorous physical activity during leisure-time</b> | 0.566 | ↘ | -0.017 | 0.36835  |
| <b>Perceived social status at school</b>                                    | 0.564 | ↘ | -0.055 | 0.00507  |
| <b>Pubertal status</b>                                                      | 0.563 | ↘ | -0.009 | 0.65035  |
| <b>Perceived fitness</b>                                                    | 0.558 | ↘ | -0.023 | 0.10348  |
| <b>Perceived health</b>                                                     | 0.558 | ↗ | -0.028 | 0.14923  |
| <b>Weight</b>                                                               | 0.556 | ↘ | -0.029 | 0.09146  |
| <b>Being bullied at school</b>                                              | 0.552 | ↗ | 0.049  | 0.00299  |
| <b>Parents interested what happens in school</b>                            | 0.552 | ↘ | -0.024 | 0.28071  |
| <b>Height</b>                                                               | 0.547 | ↘ | -0.066 | 3.11E-05 |
| <b>BMI</b>                                                                  | 0.545 | ↘ | -0.081 | 5.79E-05 |
| <b>Counts</b>                                                               | 0.545 | ↗ | 0.025  | 0.23951  |
| <b>Life enjoyment</b>                                                       | 0.544 | ↗ | -0.014 | 0.42964  |
| <b>Moderate-to-vigorous physical activity</b>                               | 0.543 | ↗ | 0.044  | 0.05773  |
| <b>Healthy diet index</b>                                                   | 0.542 | ↗ | -0.048 | 0.01030  |
| <b>Perceived social status of the family</b>                                | 0.531 | ↘ | -0.015 | 0.33614  |
| <b>Grade point in Physical Education</b>                                    | 0.529 | ↗ | -0.008 | 0.55866  |
| <b>Parents encourage to success in school</b>                               | 0.527 | ↘ | -0.041 | 0.03742  |
| <b>Continuous sedentary time</b>                                            | 0.527 | ↘ | -0.068 | 0.00019  |
| <b>Light physical activity</b>                                              | 0.526 | ↘ | 0.047  | 0.01658  |
| <b>Grade point average</b>                                                  | 0.525 | ↘ | -0.009 | 0.36841  |
| <b>Flexibility score</b>                                                    | 0.524 | ↗ | -0.019 | 0.24104  |
| <b>Body fat percentage</b>                                                  | 0.520 | ↗ | -0.037 | 0.13794  |
| <b>BMI classification</b>                                                   | 0.519 | ↘ | -0.002 | 0.91938  |

Precision exercise medicine: Predicting unfavorable status and development in the 20-m shuttle run test performance in adolescence with machine learning.  
 Laura Joensuu, Ilkka Rautiainen, Sami Äyrämö, Heidi J Syväoja, Jukka-Pekka Kauppi, Urho M Kujala, Tuija H Tammelin (2021)

|                                                           |       |   |        |          |
|-----------------------------------------------------------|-------|---|--------|----------|
| <b>Parents willing to discuss with teachers</b>           | 0.518 | ↗ | -0.092 | 3.79E-05 |
| <b>5-leaps test</b>                                       | 0.517 | ↘ | -0.039 | 0.00998  |
| <b>Push-ups</b>                                           | 0.515 | ↘ | -0.086 | 2.05E-06 |
| <b>Sedentary time</b>                                     | 0.515 | ↘ | -0.033 | 0.15816  |
| <b>Smoking habits</b>                                     | 0.515 | ↘ | -0.068 | 2.18E-05 |
| <b>Throwing-catching combination test</b>                 | 0.513 | ↗ | -0.088 | 0.00039  |
| <b>Curl-up</b>                                            | 0.512 | ↘ | -0.088 | 2.82E-05 |
| <b>School enjoyment</b>                                   | 0.512 | ↗ | -0.024 | 0.00064  |
| <b>Parents willing to help with schoolwork</b>            | 0.509 | ↗ | -0.027 | 0.03858  |
| <b>Bedtime on schooldays</b>                              | 0.508 | ↘ | -0.003 | 0.84277  |
| <b>Age</b>                                                | 0.508 | ↘ | n/a    | n/a      |
| <b>School strain</b>                                      | 0.507 | ↘ | -0.008 | 0.66655  |
| <b>Participation to sport competitions or matches</b>     | 0.506 | ↘ | -0.047 | 0.00920  |
| <b>Participation to physical activity clubs in school</b> | 0.506 | ↘ | -0.021 | 0.21880  |
| <b>Visceral fat</b>                                       | 0.506 | ↘ | -0.049 | 0.01872  |
| <b>Parents willing to help if problems at school</b>      | 0.505 | ↗ | -0.019 | 0.22798  |
| <b>Tiredness on school mornings</b>                       | 0.505 | ↘ | -0.007 | 0.55928  |
| <b>Eating breakfast during schoolweek</b>                 | 0.505 | ↗ | 0.024  | 0.10340  |
| <b>Alcohol consumption</b>                                | 0.504 | ↗ | -0.070 | 0.00196  |
| <b>Participation to sport club practices</b>              | 0.502 | ↘ | -0.032 | 0.01033  |

Precision exercise medicine: Predicting unfavorable status and development in the 20-m shuttle run test performance in adolescence with machine learning.  
 Laura Joensuu, Ilkka Rautiainen, Sami Äyrämö, Heidi J Syväoja, Jukka-Pekka Kauppi, Urho M Kujala, Tuija H Tammelin (2021)

**Supplementary Document 5. Best predictors for development**

The best predictors for 20MSRT development included ten baseline variables in girls and two in boys (Supplemental Figures below). In girls, low academic scores (GPA ( $P < 0.001$ ), and grade point in physical education, ( $P = 0.044$ ), frequent consumption of unhealthy foods ( $P < 0.001$ ), high markers of adiposity (visceral fat ( $P = 0.001$ ), and body fat percentage ( $P = 0.009$ )), low performance in 5-leaps test ( $P < 0.001$ ), low amount of accelerometry-based counts ( $P = 0.005$ ), late bedtime ( $P = 0.030$ ), low life enjoyment ( $P = 0.002$ ), and low perceived social status in school ( $P = 0.015$ ), all predicted below average age- and sex-adjusted 20MSRT development in initially below-median performers.

In boys, the overall prediction performance was statistically non-significant in boys ( $P = 0.1080$ ), with only two statistically significant predictive variables observed (Figure below): increased frequency of being bullied at school ( $P = 0.003$ ), and low amount of accelerometry-based light physical activity ( $P = 0.017$ ).

Precision exercise medicine: Predicting unfavorable status and development in the 20-m shuttle run test performance in adolescence with machine learning.  
Laura Joensuu, Ilkka Rautiainen, Sami Äyrämö, Heidi J Syväoja, Jukka-Pekka Kauppi, Urho M Kujala, Tuija H Tammelin (2021)

Girls

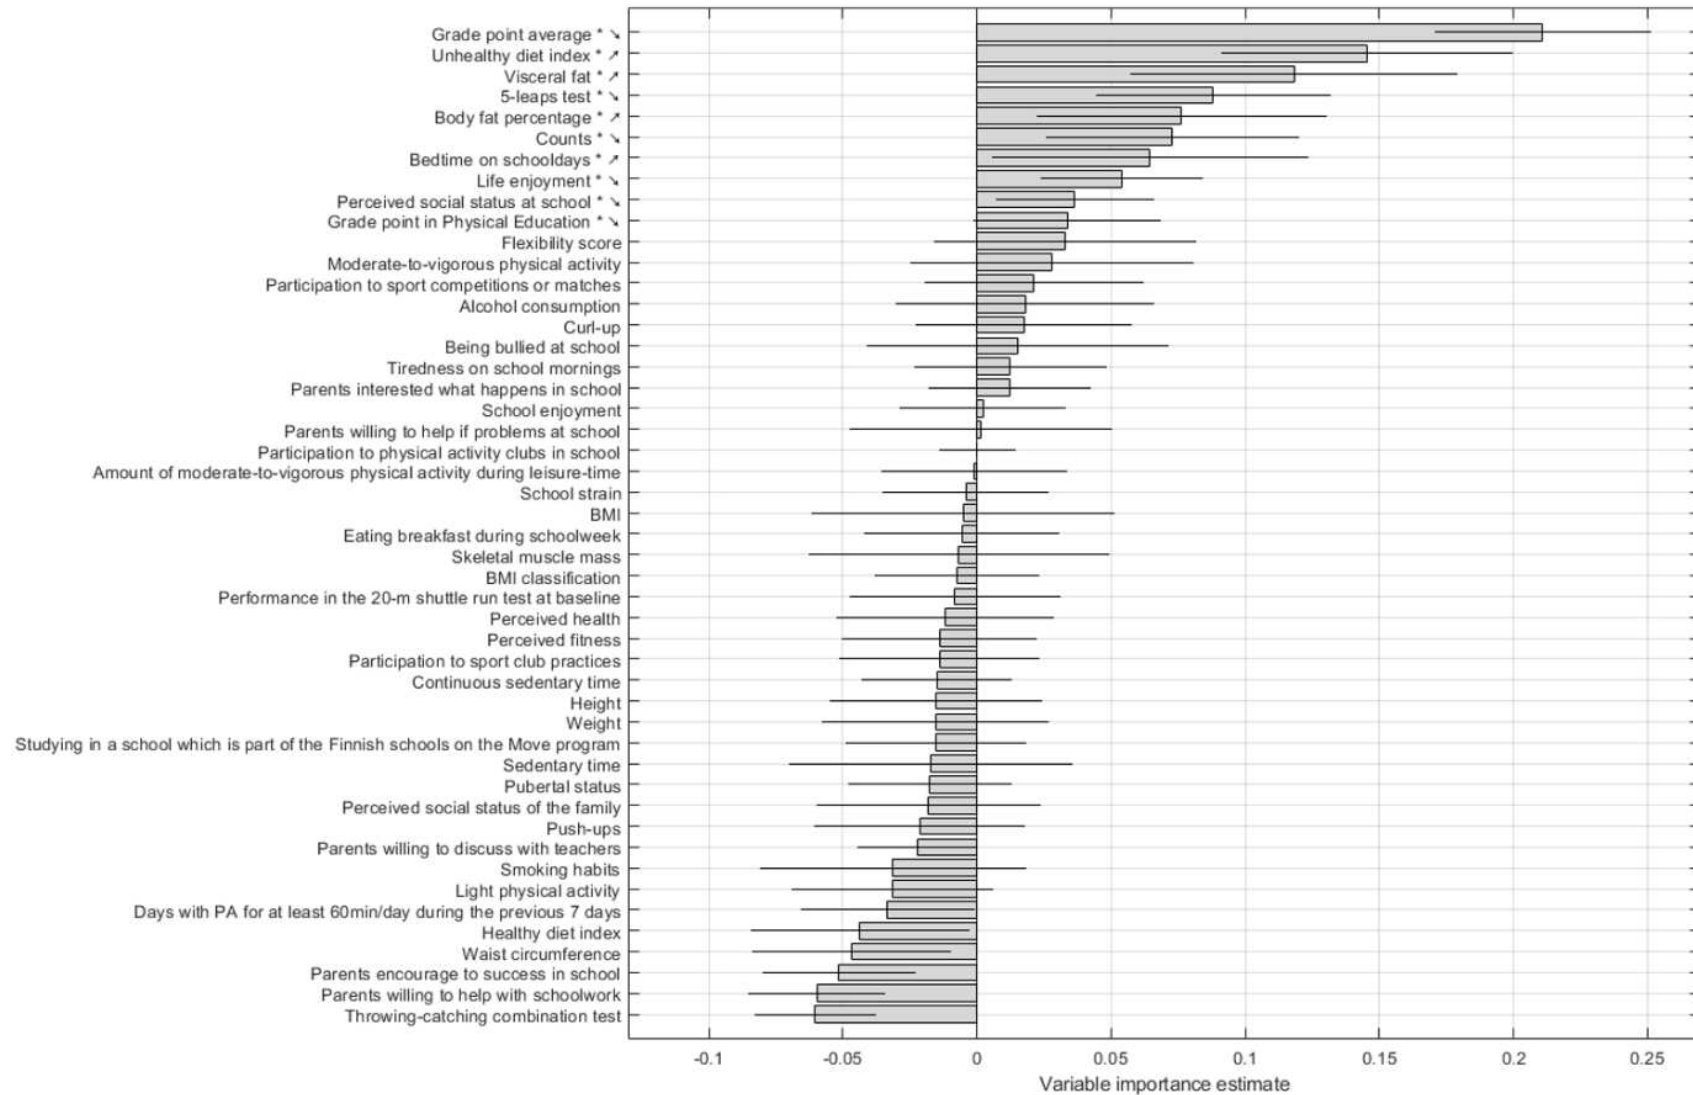

Boys

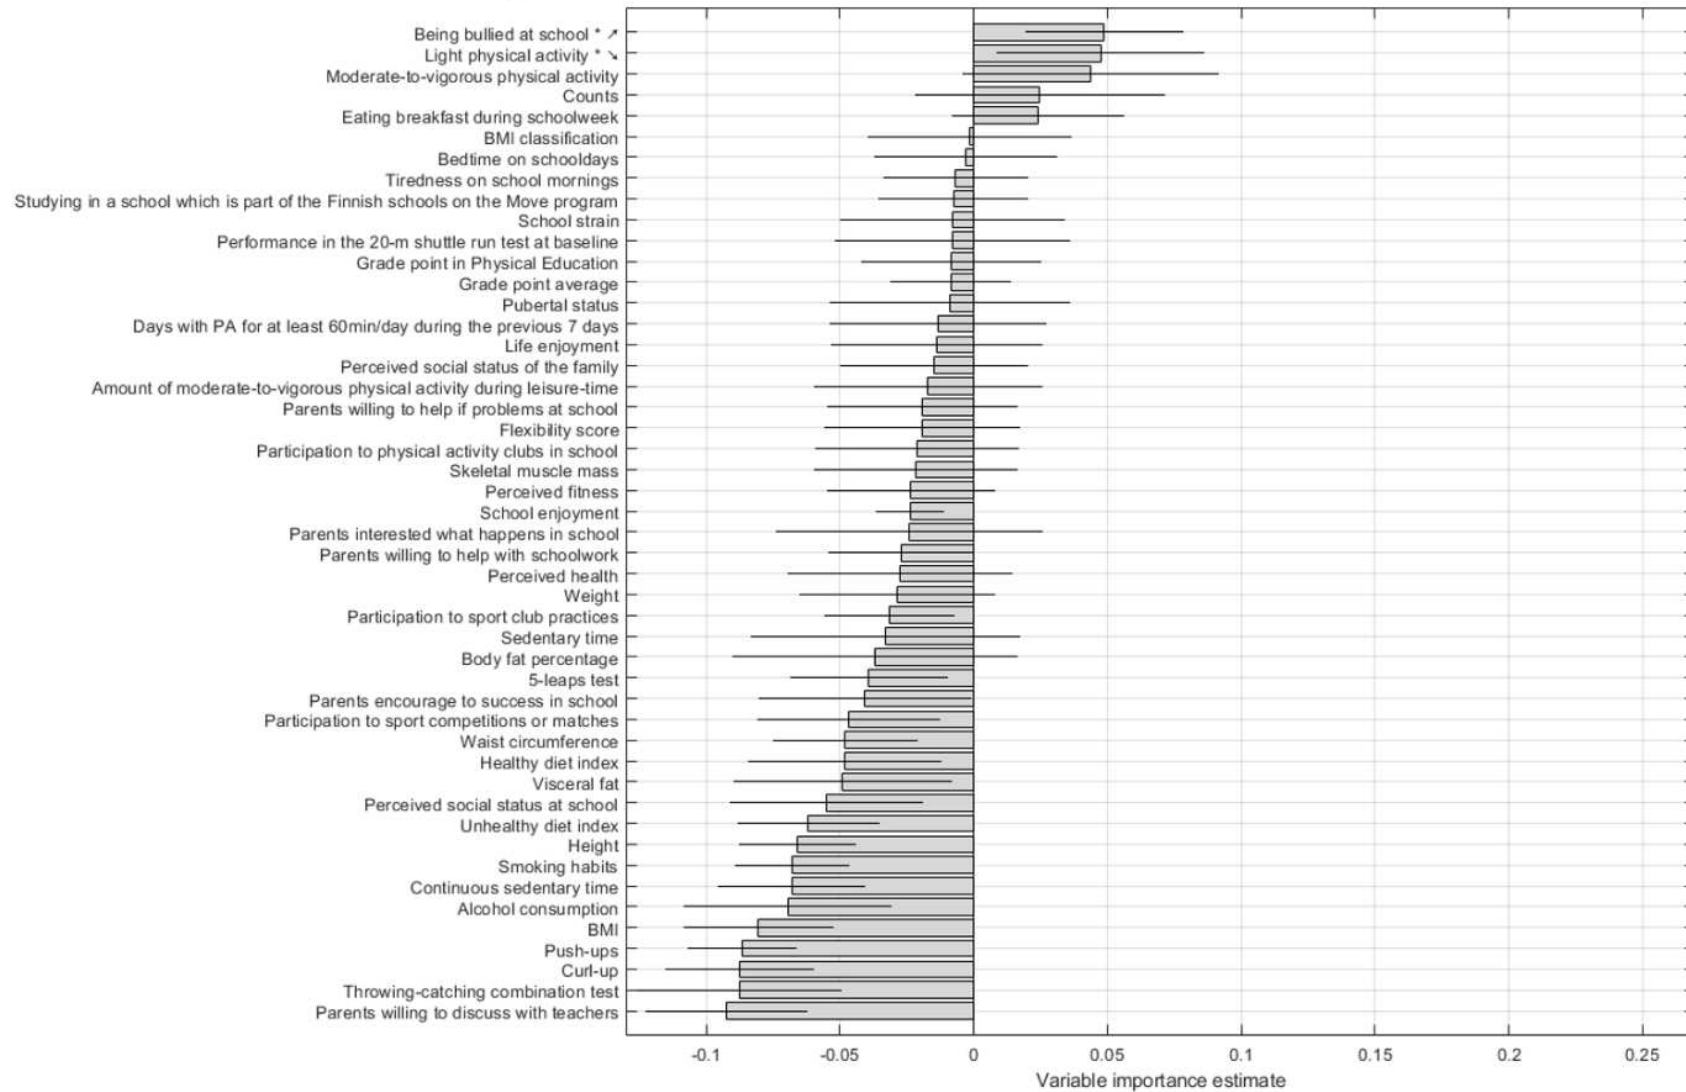

Supplement: bmjsem-2021-001053supp001_data_supplement.pdf [file bmjsem-2021-001053supp001_data_supplement.pdf]
